# Supplementary material for: Comprehensive analysis of cystatin family genes suggests their putative functions in sexual reproduction, embryogenesis, and seed formation
Source: PubMed Central journal article supplement (PMC4144781; doi:10.1093/jxb/eru274), 2014-07-04
Supplement: supp_eru274_jexbot123224_file001.pdf [file supp_eru274_jexbot123224_file001.pdf]

# Comprehensive analysis of cystatin family genes suggests their putative functions in sexual reproduction, embryogenesis and seed formation

Peng Zhao, Xue-mei Zhou, Jie Zou, Wei Wang, Lu Wang, Xiong-bo Peng, Meng-xiang Sun

## Supplemental material

The supplemental material includes three figures and three tables.

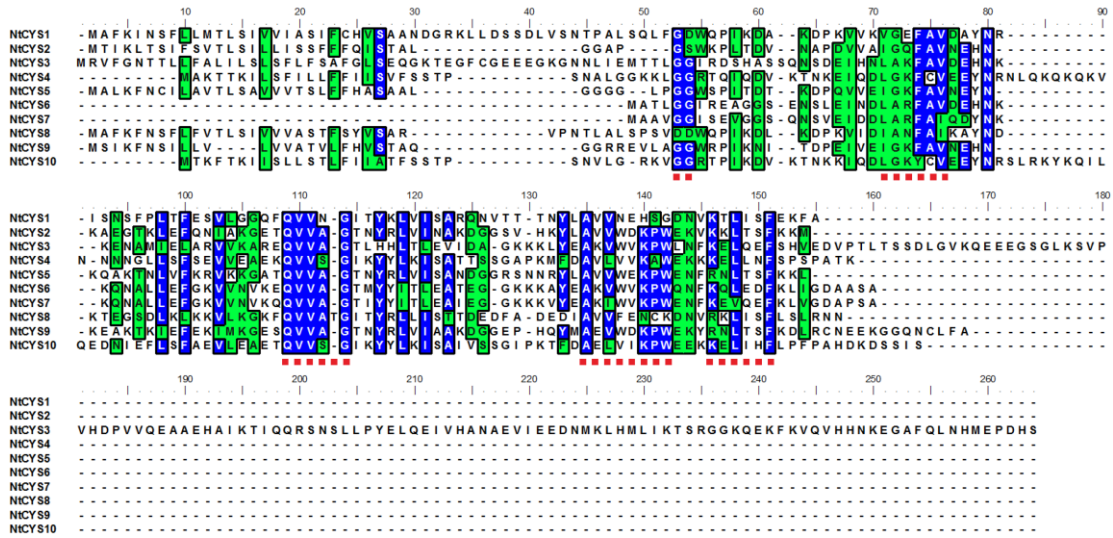

**Fig. S1.** Sequence alignment of cystatin protein sequences in tobacco

Identical residues are outlined and shaded blue. Similar residues are outlined and shaded green.

Conserved motifs in cystatins are labeled with red-dot lines.

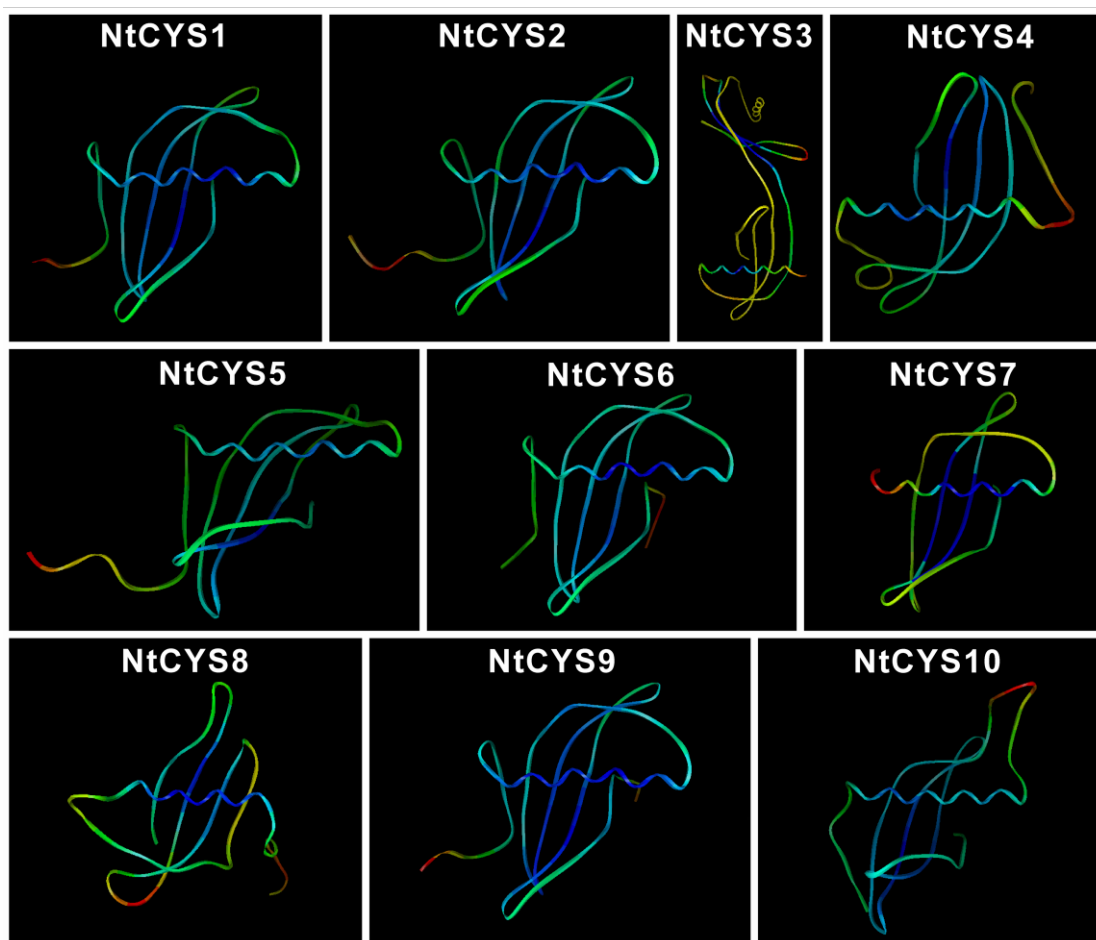

**Fig. S2. Predicated three-dimensional structures of cystatins in tobacco**

Three-dimensional structures of cystatin proteins in tobacco are colored according to 3D Molecular Viewer temperature color scheme. The color codes each atom according to the anisotropic temperature value stored in the PDB file. High values are colored in warmer colors (red) and lower values in colder colors (blue).

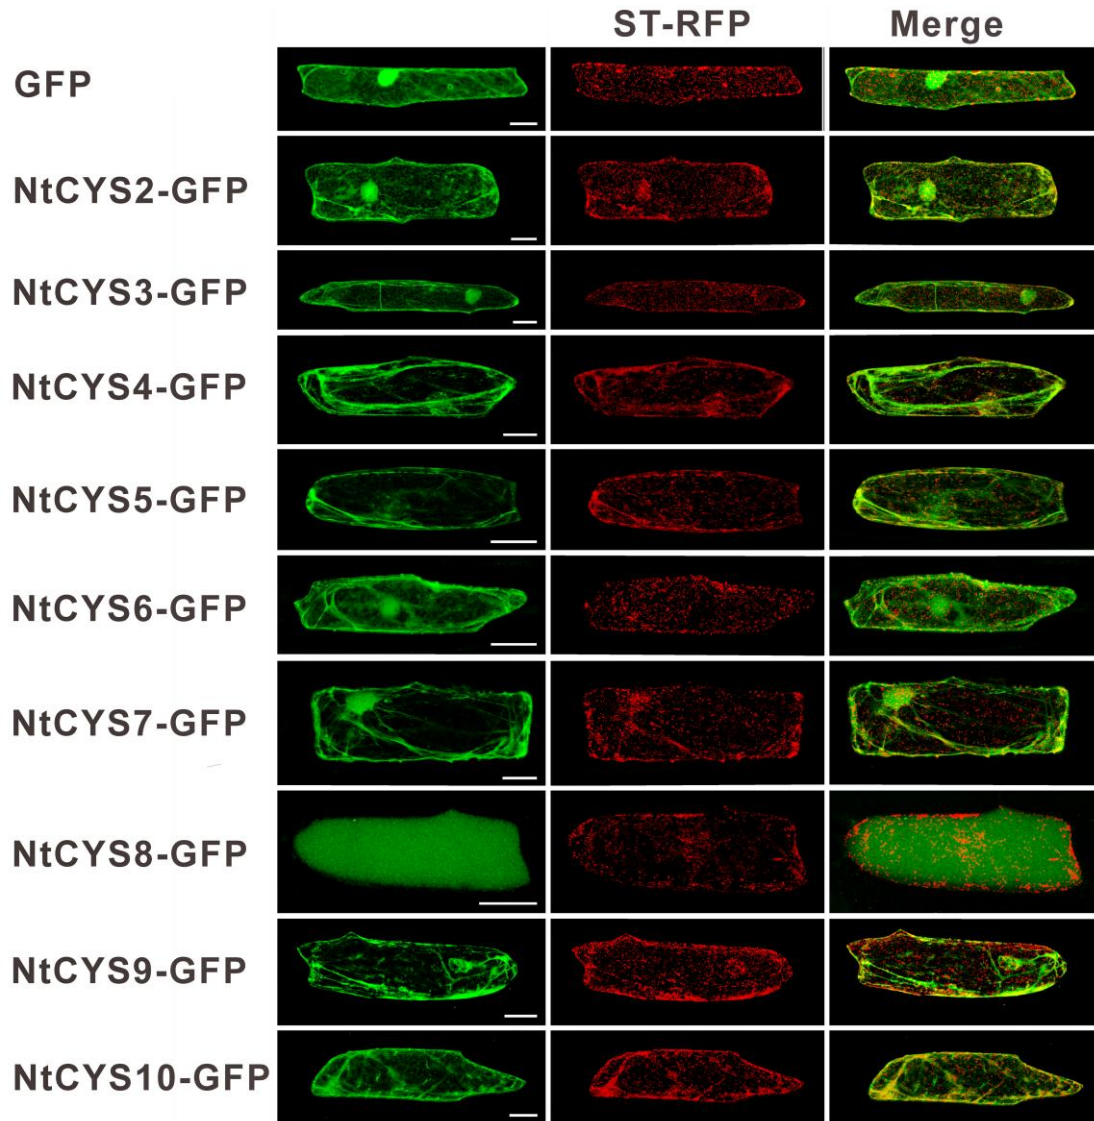

**Fig. S3. Intracellular localization of tobacco cystatins in *A. cepa* epidermal cells**

GFP alone was used as the control. Scale bars, 50  $\mu$ m.

**Table S1. Primers used in RT-PCR and RT-qPCR**

| Cystatins | For RT-PCR                        |                               | For RT-qPCR             |                            |
|-----------|-----------------------------------|-------------------------------|-------------------------|----------------------------|
|           | Forward                           | Reverse                       | Forward                 | Reverse                    |
| NiCYS2    | CACAATAAAGCGGAAGGGACAA            | ATCAACGAGGCGGATCTAGGAC        | TCGTCCTAGATCCGCCTCGT    | CCAACATCACATTTTCTCATTTTTTC |
| NiCYS3    | GATTCGTGATTCTCATGCTTCGTCC         | CCCAAACCTTAGCCTCATAGAGTTTCTT  | ACTACTCTTGGTGGGATTCGTG  | TTCTCCTTCTTGTGTGCTCG       |
| NiCYS4    | TAAAATCTCCGCAACTACTTCTC           | GTCACCCAAAATACGTTACAAATCA     | TGGGAAAGTTTTGTGTTGAAGAG | CCTGAGGAAGTAGTTGCGGAG      |
| NiCYS5    | GTCACCTCCCTTCTTCCACGCCT           | CCAAGTACCTATTGTTGCTACGACCACC  | GGTCACCTCCCTCTTCTTCCA   | GCTCCCTTCTTCACTCGTTTG      |
| NiCYS6    | TCTTGCTCGCTTTGCTGTTG              | ACCTTGGCTTCGTATGCTTTCT        | TCTTGCTCGCTTTGCTGTTG    | CCTTGGCTTCGTATGCTTTCT      |
| NiCYS7    | TGAGGGCGGAAAGAAGAAAG              | CAAATACACTAGGAGCAGAAAACCA     | ATGATCTTGCACGTTTTGCTATC | TACTTTCTTCTTTCCGCCCTC      |
| NiCYS8    | TTGCTTCCACCTTCTCCTATG             | CAAAAACAACCGCTATATCCTC        | CCGTCAGTTGATGATTGGCA    | ATCTTCGTCCGTGGTGAAA        |
| NiCYS9    | CCGTTCTCTCCATGTCTCCACC            | GGCTCTCTCCCTTCATTATTTCTCAA    | GGTTGCCACCGTCTCTTCC     | CTCAGGGTCCGTTATGTTTTTATG   |
| NiCYS10   | ACTCTCTTCATAATAGCAACATTTTCTCAACCC | GCGGAGATTTTAAGGTAATATTTGATCCA | TCATTTCCCTTCTCTCCACTCTC | CTTCCCCCAACTTTTCGTCC       |

**Table S2. Primers used in vector construction**

| Cystatin | For pMXB10                            |                                       |
|----------|---------------------------------------|---------------------------------------|
|          | Forward                               | Reverse                               |
| NiCYS2   | NNNN CATATG TTGGGCGGCACCAGGTAGTTGGAAG | NNNN CTCGAG CATTMTTTTGAAGAAGTAAGCTTC  |
| NiCYS3   | NNNN CCATGG AT TTAAGCGAACAAGGAAAACCG  | NNNN CTCGAG GGAGTGGTCAGGCTCCATATGATTC |
| NiCYS4   | NNNN CATATG TCAACCCCATCAAATGCTTTAGG   | NNNN CTCGAG CTTAGTAGCAGGAGAAGGAGAAAAG |
| NiCYS5   | NNNN CATATG CTCGGCGGTGGTGGTTACCAG     | NNNN CTCGAG TAATMTTTTGAAGGAAGTGAGGTTC |
| NiCYS6   | NNNN CATATG ATGGCAACTCTAGGAGGAATTC    | NNNN CTCGAG AGCACTAGCGGCATCCCAATAAGC  |
| NiCYS7   | NNNN CATATG ATGGCAGCTGTAGGAGGCATTAG   | NNNN GCGGCCGC C AGCACTTGGGGCATCGCCAAC |
| NiCYS8   | NNNN CATATG CGCGTACCGAATACTCTAGCTCTG  | NNNN CTCGAG ATTGTTACGAACTTAAAAAAG     |
| NiCYS9   | NNNN CATATG CAGGGCGGTCTGGAGAGAGGTTTTG | NNNN CTCGAG AGCAAAAAGACAATTTTGTCTCC   |
| NiCYS10  | NNNN CATATG CGAAAAGTTGGGGGAAGAAC      | NNNN CTCGAG ACTAATACTACTGTCTTTATCATG  |

  

| Cystatin | For pRS300-35S-eGFP-NOS                    |                                         |
|----------|--------------------------------------------|-----------------------------------------|
|          | Forward                                    | Reverse                                 |
| NiCYS2   | NNNN TCTAGA ATGACCATCAAATTGACCTCTATTTTC    | NNNN CTGCAG CATTMTTTTGAAGAAGTAAGC       |
| NiCYS3   | NNNN GAATTC ATGAGAGTATTTGGTAACACCACAC      | NNNN CTCGAG GGAGTGGTCAGGCTCCATATGATTC   |
| NiCYS4   | NNNN TCTAGA ATGGCAAAAACAACAAAATCCTC        | NNNN CTGCAG CTTAGTAGCAGGAGAAGGAGAAAAG   |
| NiCYS5   | NNNN TCTAGA ATGGCCCTCAAATTCAACTGTATCC      | NNNN CTGCAG TAATMTTTTGAAGGAAGTGAGGTTC   |
| NiCYS6   | NNNN TCTAGA ATGGCAACTCTAGGAGGAATTCGTG      | NNNN CTGCAG AGCACTAGCGGCATCCCAATAAGCTTG |
| NiCYS7   | NNNN TCTAGA ATGGCAGCTGTAGGAGGCATTAGC       | NNNN CTGCAG AGCACTTGGGGCATCGCCAACAAG    |
| NiCYS8   | NNNN TCTAGA ATGGCTTTCAAATTCAAATCTTTTCTTTTG | NNNN CTGCAG ATTGTTACGAACTTAAAAAAG       |
| NiCYS9   | NNNN TCTAGA ATGTCTATCAAATTCAAATCCATCCTC    | NNNN CTGCAG AGCAAAAAGACAATTTTGTCTCC     |
| NiCYS10  | NNNN TCTAGA ATGACGAAATTCACAAAATCATTTTC     | NNNN CTGCAG ACTAATACTACTGTCTTTATCATG    |

**Table S3. Protease activities in extracts from developing tobacco seeds with or without recombinant cystatins**

| Cystatin | Stage 1                                                |                 |                 | Stage 3                                                |                 |                 | Stage 6                                                |                 |                 | Stage 7                                                |                 |                 | Stage 9                                                |                 |                 |
|----------|--------------------------------------------------------|-----------------|-----------------|--------------------------------------------------------|-----------------|-----------------|--------------------------------------------------------|-----------------|-----------------|--------------------------------------------------------|-----------------|-----------------|--------------------------------------------------------|-----------------|-----------------|
|          | FR-AMC                                                 | RR-AMC          | FVR-AMC         | FR-AMC                                                 | RR-AMC          | FVR-AMC         | FR-AMC                                                 | RR-AMC          | FVR-AMC         | FR-AMC                                                 | RR-AMC          | FVR-AMC         | FR-AMC                                                 | RR-AMC          | FVR-AMC         |
|          | V0 ( $\mu\text{M}$ per hour per $\mu\text{g}$ protein) |                 |                 | V0 ( $\mu\text{M}$ per hour per $\mu\text{g}$ protein) |                 |                 | V0 ( $\mu\text{M}$ per hour per $\mu\text{g}$ protein) |                 |                 | V0 ( $\mu\text{M}$ per hour per $\mu\text{g}$ protein) |                 |                 | V0 ( $\mu\text{M}$ per hour per $\mu\text{g}$ protein) |                 |                 |
| CK       | 32.02 $\pm$ 2.86                                       | 2.55 $\pm$ 0.08 | 3.61 $\pm$ 0.13 | 38.83 $\pm$ 4.39                                       | 1.47 $\pm$ 0.05 | 2.86 $\pm$ 0.37 | 5.95 $\pm$ 1.58                                        | 0.60 $\pm$ 0.15 | 0.75 $\pm$ 0.28 | 0.99 $\pm$ 0.06                                        | 1.13 $\pm$ 0.13 | 0.84 $\pm$ 0.07 | 1.08 $\pm$ 0.05                                        | 1.03 $\pm$ 0.11 | 0.77 $\pm$ 0.07 |
| NtCYS2   | 1.44 $\pm$ 0.06                                        | 1.86 $\pm$ 0.08 | 1.35 $\pm$ 0.10 | 0.85 $\pm$ 0.19                                        | 0.92 $\pm$ 0.08 | 0.98 $\pm$ 0.13 | 0.46 $\pm$ 0.27                                        | 0.44 $\pm$ 0.06 | 0.35 $\pm$ 0.04 | 0.81 $\pm$ 0.01                                        | 0.97 $\pm$ 0.02 | 0.64 $\pm$ 0.04 | 0.84 $\pm$ 0.05                                        | 0.94 $\pm$ 0.01 | 0.61 $\pm$ 0.02 |
| NtCYS3   | 1.31 $\pm$ 0.06                                        | 1.61 $\pm$ 0.06 | 0.90 $\pm$ 0.06 | 1.05 $\pm$ 0.19                                        | 0.86 $\pm$ 0.05 | 1.04 $\pm$ 0.15 | 0.45 $\pm$ 0.29                                        | 0.43 $\pm$ 0.05 | 0.32 $\pm$ 0.03 | 0.73 $\pm$ 0.03                                        | 0.95 $\pm$ 0.02 | 0.55 $\pm$ 0.03 | 0.76 $\pm$ 0.03                                        | 0.91 $\pm$ 0.01 | 0.55 $\pm$ 0.01 |
| NtCYS4   | 1.34 $\pm$ 0.06                                        | 1.57 $\pm$ 0.05 | 0.91 $\pm$ 0.08 | 0.82 $\pm$ 0.16                                        | 0.85 $\pm$ 0.08 | 1.00 $\pm$ 0.11 | 0.43 $\pm$ 0.23                                        | 0.42 $\pm$ 0.06 | 0.32 $\pm$ 0.03 | 0.76 $\pm$ 0.02                                        | 0.93 $\pm$ 0.02 | 0.57 $\pm$ 0.03 | 0.81 $\pm$ 0.02                                        | 0.89 $\pm$ 0.02 | 0.57 $\pm$ 0.02 |
| NtCYS5   | 1.41 $\pm$ 0.06                                        | 1.67 $\pm$ 0.04 | 0.90 $\pm$ 0.12 | 0.82 $\pm$ 0.19                                        | 0.86 $\pm$ 0.07 | 0.76 $\pm$ 0.13 | 0.45 $\pm$ 0.24                                        | 0.42 $\pm$ 0.06 | 0.32 $\pm$ 0.02 | 0.76 $\pm$ 0.02                                        | 0.94 $\pm$ 0.03 | 0.59 $\pm$ 0.04 | 0.81 $\pm$ 0.03                                        | 0.89 $\pm$ 0.02 | 0.59 $\pm$ 0.02 |
| NtCYS6   | 1.50 $\pm$ 0.10                                        | 2.21 $\pm$ 0.04 | 1.60 $\pm$ 0.11 | 0.89 $\pm$ 0.16                                        | 1.16 $\pm$ 0.12 | 1.08 $\pm$ 0.15 | 0.43 $\pm$ 0.25                                        | 0.46 $\pm$ 0.05 | 0.39 $\pm$ 0.05 | 0.82 $\pm$ 0.03                                        | 1.03 $\pm$ 0.02 | 0.72 $\pm$ 0.03 | 0.85 $\pm$ 0.03                                        | 0.99 $\pm$ 0.01 | 0.65 $\pm$ 0.02 |
| NtCYS7   | 1.89 $\pm$ 0.22                                        | 2.41 $\pm$ 0.11 | 1.86 $\pm$ 0.12 | 1.55 $\pm$ 0.47                                        | 1.32 $\pm$ 0.14 | 1.48 $\pm$ 0.19 | 0.55 $\pm$ 0.30                                        | 0.52 $\pm$ 0.03 | 0.45 $\pm$ 0.06 | 0.85 $\pm$ 0.02                                        | 1.05 $\pm$ 0.05 | 0.77 $\pm$ 0.03 | 0.86 $\pm$ 0.04                                        | 0.99 $\pm$ 0.02 | 0.69 $\pm$ 0.01 |
| NtCYS8   | 30.06 $\pm$ 1.95                                       | 2.53 $\pm$ 0.11 | 3.36 $\pm$ 0.16 | 36.85 $\pm$ 3.61                                       | 1.40 $\pm$ 0.09 | 3.00 $\pm$ 0.23 | 5.81 $\pm$ 0.79                                        | 0.55 $\pm$ 0.02 | 0.70 $\pm$ 0.04 | 0.98 $\pm$ 0.03                                        | 1.06 $\pm$ 0.03 | 0.79 $\pm$ 0.02 | 1.00 $\pm$ 0.04                                        | 0.97 $\pm$ 0.01 | 0.70 $\pm$ 0.02 |
| NtCYS9   | 1.28 $\pm$ 0.10                                        | 1.59 $\pm$ 0.06 | 1.10 $\pm$ 0.05 | 0.78 $\pm$ 0.16                                        | 0.81 $\pm$ 0.06 | 0.67 $\pm$ 0.12 | 0.40 $\pm$ 0.22                                        | 0.41 $\pm$ 0.06 | 0.30 $\pm$ 0.04 | 0.74 $\pm$ 0.01                                        | 0.92 $\pm$ 0.02 | 0.58 $\pm$ 0.03 | 0.78 $\pm$ 0.02                                        | 0.87 $\pm$ 0.01 | 0.57 $\pm$ 0.02 |
| NtCYS10  | 1.34 $\pm$ 0.06                                        | 1.66 $\pm$ 0.05 | 0.98 $\pm$ 0.08 | 0.85 $\pm$ 0.19                                        | 0.87 $\pm$ 0.08 | 0.92 $\pm$ 0.09 | 0.42 $\pm$ 0.23                                        | 0.43 $\pm$ 0.05 | 0.34 $\pm$ 0.03 | 0.74 $\pm$ 0.03                                        | 0.91 $\pm$ 0.02 | 0.56 $\pm$ 0.03 | 0.77 $\pm$ 0.04                                        | 0.87 $\pm$ 0.02 | 0.56 $\pm$ 0.02 |

CK means the hydrolytic activities of cysteine proteases in seeds at different stages without addition of any recombinant cystatins. (n=3)
